1 Evaluating Improvements to Exposure Estimates from Fate and Transport Models by  
2 Incorporating Environmental Sampling Effort and Landscape-level Contaminant Use

3

4 Samantha L. Rumschlag<sup>a\*</sup>, Scott M. Bessler<sup>a</sup>, and Jason R. Rohr<sup>a</sup>

5 <sup>a</sup>4202 East Fowler Avenue, Department of Integrative Biology, University of South Florida,

6 Tampa, FL, USA

7 \*corresponding author: rumschsl@gmail.com

8

9

## ABSTRACT

10 The Pesticide in Water Calculator (PWC) is a fate and transport model used by the  
11 Environmental Protection Agency and Health Canada to estimate pesticide exposures in lentic  
12 freshwater ecosystems and make pesticide registration decisions. We leverage over 600,000 field  
13 measurements of 31 common insecticides and herbicides to test whether incorporating  
14 environmental sampling effort (number of times a pesticide is sampled) and landscape-level  
15 contaminant use (national application amount) can improve PWC validation and prediction,  
16 respectively. We found that maximum measured concentrations of 38% of herbicides and 42% of  
17 insecticides exceeded maximum estimated environmental concentrations (EECs) generated by  
18 the PWC, suggesting that EECs often do not represent worst-case exposure. For lentic systems,  
19 variance in pesticide field measurements explained by EECs increased by 50% when sampling  
20 effort was included. For lotic systems, variance explained increased by only 4%, most likely  
21 because lotic systems are sampled over 4.9 times as much as lentic systems. Including landscape-  
22 level use more than doubled the ability of the PWC to predict maximum pesticides  
23 concentrations in lentic systems. Exposure characterization in risk assessment can be improved  
24 by including sampling effort in model validation and landscape-level use in predictions, thus  
25 providing more defensible environmental standards and regulations.

26

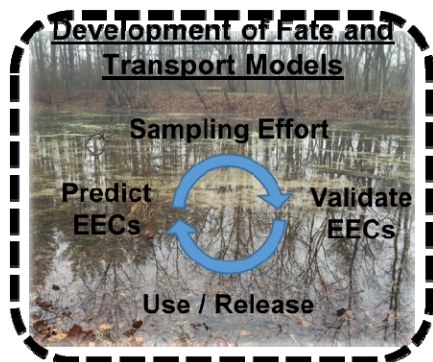

27 Keywords: pesticide, field concentration, Pesticide in Water Calculator, pesticide regulation,  
28 pond pollution, exposure assessment, exposure characterization, estimated environmental  
29 concentrations

30 INTRODUCTION

31 Chemical pollution represents one of the most widespread and destructive forms of  
32 human disturbance on earth<sup>1-3</sup>, threatening the health and wellbeing of humans<sup>4-6</sup> and the  
33 environment<sup>7-9</sup>. For instance, more than 500 million pounds of active ingredients of pesticides  
34 are applied annually in the US<sup>10</sup>, leading to well-documented, widespread contamination of  
35 freshwater systems<sup>11-13</sup> that provide habitat for about 10% of all described taxa on earth<sup>14</sup>.  
36 Therefore, the ability to predict levels of contamination in the field is critical to accurately  
37 assessing human and wildlife exposures and designing effective management strategies to  
38 minimize risks in sensitive systems.

39 Fate and transport models are important tools for predicting contaminant exposures. For  
40 instance, the United States (US) Environmental Protection Agency (EPA) and Health Canada use  
41 the Pesticide in Water Calculator (PWC) model to generate a peak estimated environmental  
42 concentration (EEC)<sup>15</sup> of a focal pesticide in a standardized lentic waterbody that is a set distance  
43 from a site of application<sup>16</sup>. The model calculates an EEC based on inputs of pesticide traits (e.g.  
44 half-life and Koc), application amount and frequency (based on crop of interest), and soil and  
45 climatic characteristics (based on a region of interest)<sup>16</sup>. EECs of a variety of chemicals,  
46 including those that are not pesticides, are used in human health and ecological risk assessments.  
47 Generally, the EPA uses the PWC to predict pesticide EECs in ponds and reservoirs, which are  
48 used in ecological risk assessments and drinking water assessments, respectively<sup>17</sup>. Historically,  
49 the maximum EEC for pesticides has been regarded as a “worst-case” chemical exposure  
50 scenario in freshwater systems by the EPA<sup>15</sup>. In risk assessment, EECs are compared against  
51 toxicity values (e.g. LC50) to characterize the likelihood of toxicity at a given level of  
52 exposure<sup>15,18</sup>. Evaluation of EECs in this way informs the development of environmental

53 standards, policies, guidelines, and regulations, as well as the registration of chemicals for legal  
54 use<sup>18</sup>.

55 While the PWC might be the best tool available currently for decision makers to estimate  
56 the potential for pesticide contamination in freshwater ecosystems, the increased availability of  
57 large-scale data on pesticide use and detection provides an opportunity for the accuracy of these  
58 exposure estimates to be evaluated and improved. The true or actual peak environmental  
59 concentration of any given pesticide is an extremely rare event in time and space, and thus  
60 validating model predictions of peak environmental concentrations necessitates copious field  
61 measurements, many more than are required to reliably predict mean environmental  
62 concentrations<sup>19</sup>. Fortunately, over the last three decades, federal agencies including the EPA and  
63 US Geological Survey (USGS) have compiled hundreds of thousands of field measurements of  
64 pesticides from lotic (streams and rivers) and lentic (ponds and reservoirs) freshwater ecosystems  
65 across the US. These publicly available data allow us to evaluate if EECs are indeed indicative of  
66 worst-case exposure scenarios and to determine the congruence between predicted EECs from  
67 the PWC and measured maximum concentrations of pesticides in the field.

68 The development of fate and transport models often progresses by repeating the  
69 following two steps: (1) a validation step, where predicted maximum EECs are correlated with  
70 measured or observed maximum environmental concentrations to determine their accuracy<sup>20,21</sup>,  
71 and (2) a prediction improvement step, where the model is modified to improve its fit to  
72 measured field concentrations (Fig. 1A). We use the term validation to mean the process of  
73 comparing model output to measurements<sup>22</sup>. These two steps are the foci of the current study.

74 An important consideration for model validation of contaminant fate and transport  
75 models might be environmental sampling effort, defined as the total number of times a pesticide

76 is surveyed across locations and time. If we are to determine how well maximum EECs predict  
77 maximum field concentrations of contaminants, we must account for the variance in maximum  
78 field concentrations that is a function of sampling effort. For instance, we propose that sampling  
79 effort should be related asymptotically to the maximum environmental concentration of a  
80 contaminant, such that increases in sampling effort increase the likelihood of detecting the true  
81 peak environmental concentration at low (gray section in Fig. 1B) but not high sampling efforts  
82 (white section in Fig. 1B). Given this proposed relationship, we hypothesize that incorporating  
83 information on environmental sampling effort will improve the ability of the PWC to predict  
84 maximum environmental concentrations, but only for systems that are not well sampled and thus  
85 fall on the section of the sampling effort-maximum field concentration curve that is increasing  
86 rather than near the asymptote.

87 PWC predictions might be improved by accounting for multiple sources of contaminant  
88 use or release. Most fate and transport models, including the PWC, assume a single point source  
89 of contamination, but measured concentrations in freshwater ecosystems are often the result of  
90 runoff and aerial deposition from multiple sources of contamination across the landscape. The  
91 inaccurate assumption of a single point source could misrepresent the true or actual peak  
92 concentration in the environment that the PWC seeks to model. Thus, we hypothesize that  
93 incorporating information on landscape-level use or releases of chemicals might improve the  
94 ability of fate and transport models to predict maximum field concentrations because landscape-  
95 level use is a proxy for multiple sources of contamination. The USGS recently provided pesticide  
96 use estimates for each county in the US, allowing us to evaluate how the inclusion of landscape-  
97 level pesticide applications affects the ability of the PWC to predict maximum measured  
98 concentrations in the environment.

99           To test the hypotheses that the validation and predictions of fate and transport models can  
100 be improved by accounting for environmental sampling effort and landscape-level contaminant  
101 release information, respectively, we selected 31 of the most commonly used pesticides and  
102 compiled data describing their use, application rate, environmental mobility, EECs from the  
103 PWC, and maximum measured environmental concentrations in lentic and lotic systems. We  
104 predicted that EECs would not represent worst-case scenarios of exposure because EECs fail to  
105 incorporate landscape-level pesticide use and instead model a commonly unrealistic single point-  
106 source. Given the postulated importance of sampling effort, we predicted that the PWC would  
107 more accurately predict maximum concentrations in lotic than lentic systems because lotic  
108 systems are sampled for pesticides nearly 4.9 times as much as lentic systems (mean number  $\pm$   
109 standard deviation of lotic versus lentic samples per pesticide from federal databases:  $16,111 \pm$   
110  $10,301$  vs.  $3,304 \pm 3,005$ ). Finally, we predicted that the PWC's predictions of maximum EECs  
111 could be improved by incorporating landscape-level use or release information to account for  
112 likely multiple sources of pesticides to freshwater ecosystems.

113

114

## METHODS

### *Pesticide Selection*

116           Our analyses focus on the 31 most commonly used herbicides and insecticides applied on  
117 corn in the US (Table 1). To select this group of pesticides, we first ranked insecticides and  
118 herbicides based on their estimated use in the US by summing 2006 county-level pesticide use  
119 estimates from the Estimated Annual Agricultural Pesticide Use dataset provided by Pesticide  
120 National Synthesis Project of the National Water Quality Assessment (NAWQA) Program (US  
121 Geological Survey [USGS]) (<https://water.usgs.gov/nawqa/pnsp/usage/maps/county-level/>). We

122 classified each pesticide as an herbicide or insecticide using the primary use type classifications  
123 indicated by the Pesticide Action Network (PAN) Pesticide Database  
124 (<http://www.pesticideinfo.org/>). We excluded mineral or biologic (e.g. bacteria) pesticides,  
125 because we were interested in examining the transport and fate of synthetic compounds. From  
126 these most commonly used synthetic herbicides and insecticides, we selected compounds that  
127 were detected in streams from 1992 to 2012 by the USGS NAWQA program  
128 ([www.waterqualitydata.us/portal](http://www.waterqualitydata.us/portal), obtained on 30 March 2017). Finally, we examined  
129 commercial product use labels and only included compounds that were used on corn because  
130 standard EPA scenarios used in the calculation of EECs (see below) are more frequently  
131 available across geographic regions in the US for corn than other crops. This selection process  
132 resulted in 16 herbicides and 15 insecticides (Table 1).

### 133 *Building a Dataset Characterizing Herbicides and Insecticides*

134 We built a dataset describing each selected pesticides' use, application rate,  
135 environmental mobility and persistence, and maximum measured environmental concentration  
136 (Tables S1 and S2). For each compound, we determined an estimate of national use by summing  
137 all county-level pesticide estimates from the Estimated Annual Agricultural Pesticide Use dataset  
138 from 1992 to 2012. Maximum concentrations of pesticides in lotic systems were taken from  
139 stream survey data from 1992 to 2012 from the USGS NAWQA program (from  
140 <https://www.waterqualitydata.us/>, obtained on 30 March 2017, filtered by NAWQA program and  
141 stream site type). The total number of stream surveys from which maximum concentrations were  
142 taken totaled 499,435. Maximum concentrations of pesticides in lentic systems were taken from  
143 surveys of lakes, reservoirs, impoundments, and wetlands from 1992 to 2012 available from  
144 National Water Quality Monitoring Council (<https://www.waterqualitydata.us/>, obtained on 9



145 November 2017, filtered by site type to include lakes, reservoirs, impoundments, and wetlands).  
146 The total number of surveys from these lentic systems from which maximum concentrations  
147 were taken totaled 129,471. Although a valuable consideration might be to examine a  
148 distribution of estimated environmental or field concentrations and focus on the top 95% or 99%  
149 percentile, risk assessments are generally concerned with a single maximum estimated  
150 environmental or field concentration, so our focus was on gathering a single maximum  
151 concentration for each pesticide. For each pesticide, a single maximum concentration was taken  
152 from across lentic and lotic survey locations and times. To help limit the influence of timing of  
153 sampling on detection of maximum concentrations, we excluded samples that were triggered by  
154 a hydrologic event (i.e., event-based sampling), such as a flood or a storm. Instead, we focused  
155 on field samples that were gathered as part of routine-based sampling efforts. Since we wanted to  
156 record maximum observed pesticide concentrations; both filtered and whole water sample were  
157 considered. We also recorded sampling effort for each pesticide in lentic and lotic systems,  
158 which was the number of times a pesticide was surveyed for across locations and time. More  
159 information concerning how each maximum pesticide concentration was determined is provided  
160 in Tables S3 and S4. In addition, we gathered maximum field concentrations from lakes, ponds,  
161 agricultural ditches, and tailwaters by reviewing the published scientific literature to evaluate  
162 whether maximum EECs are indeed worst-case scenarios of exposure using the most information  
163 possible on maximum lentic concentrations. We conducted a literature search using Web of  
164 Science and Google Scholar using combinations of the following terms: “concentration”,  
165 “tailwater”, “pond”, “ditch”, “runoff”, “field concentration”, and the name of the focal pesticide  
166 (e.g. atrazine). In the final dataset, we include only values from the literature that exceeded  
167 pesticide field database values in lentic systems. Individual maximum concentrations of

168 pesticides gathered from databases or the literature represent observed maximum measured  
169 concentrations and not the true or actual peak concentrations, which can only be greater than or  
170 equal to the maximum measured concentration<sup>19</sup>.

### 171 *Generating Estimated Environmental Concentrations*

172 Data describing the environmental mobility and persistence of herbicides used in the  
173 calculation of EECs, including Koc, water column metabolism half-life, benthic metabolism  
174 half-life, foliar half-life, aqueous photolysis half-life, molecular weight, vapor pressure, and  
175 solubility, were taken primarily from the Pesticide Properties DataBase from the University of  
176 Herfordshire (PPDB, <https://sitem.herts.ac.uk/aeru/ppdb/en/>). Values for hydrolysis half-life and  
177 aerobic soil half-life were taken from PAN Pesticide Database. When values were not available  
178 for certain pesticides from PAN or PPDB, we used data from the Toxicology Data Network  
179 (TOXNET) from the National Institutes of Health  
180 (<https://toxnet.nlm.nih.gov/newtoxnet/hsdb.htm>) as indicated in Tables S1 and S2.

181 Additional pesticides traits included Henry's constant, heat of Henry, air diffusion  
182 coefficient, and application information (Tables S1 and S2). Henry's constant and the heat of  
183 Henry were taken from the EPA's Estimation Program Interface (EPI) Suite, specifically  
184 HENRYWIN. Henry's constant was calculated using the bond contribution method. We  
185 calculated the air diffusion coefficient using the EPA's On-line Tools for Site Assessment  
186 Calculation ([https://www3.epa.gov/ceampubl/learn2model/part-two/onsite/estdiffusion-](https://www3.epa.gov/ceampubl/learn2model/part-two/onsite/estdiffusion-ext.html)  
187 [ext.html](https://www3.epa.gov/ceampubl/learn2model/part-two/onsite/estdiffusion-ext.html)). Data concerning number of applications per year, timing of applications, and  
188 maximum recommended application rate and method were taken from US commercial pesticide  
189 product labels. For herbicides, product instructions for pre-emergent applications for corn were  
190 followed when available. We assumed that the last application of pre-emergent herbicides would

191 occur just after planting, 12 days prior to corn emergence. For herbicides that are exclusively  
192 applied post-emergence, we assumed applications would occur 10 days after corn emergence.  
193 We assumed all herbicides would be applied by direct ground spray, unless product labels  
194 indicated the need for soil incorporation. In those cases, applications were set to occur at the  
195 suggested depth of soil incorporation based on the product label. For insecticides, product  
196 application instructions for post-emergent applications for corn were used when available. We  
197 assumed that the first applications would occur 30 days after emergence by spray above the  
198 plant. For insecticides that are applied pre-emergence, we assumed applications would occur 12  
199 days before emergence by ground spray at the depth of soil incorporation according to the  
200 product labels.

201           Using the EPA's Pesticide in Water Calculator v. 1.52 (PWC,  
202 [https://www.epa.gov/pesticide-science-and-assessing-pesticide-risks/models-pesticide-risk-](https://www.epa.gov/pesticide-science-and-assessing-pesticide-risks/models-pesticide-risk-assessment#PWC)  
203 [assessment#PWC](https://www.epa.gov/pesticide-science-and-assessing-pesticide-risks/models-pesticide-risk-assessment#PWC)), we generated EECs of the selected pesticides. Model inputs consisted of  
204 mobility, persistence, and application data for individual pesticide compounds (Tables S1 and  
205 S2). For all pesticide compounds, water, benthic, and soil reference temperatures were assumed  
206 to be 23 degrees C, and photolysis reference latitude was 40 degrees. When foliar half-life was  
207 not available for a given pesticide, foliar half-life was assumed not to be a large contributor to  
208 breakdown in the environment in the PWC model and was set to zero. Under the  
209 recommendation of the PWC user manual, efficiency was set to 0.99 and drift was set to 0.01 for  
210 all pesticide compounds. Applications were assumed to occur every year. For each pesticide  
211 compound, EECs were generated for both ponds and reservoirs in each of five different states  
212 (Illinois, Mississippi, North Carolina, Ohio, and Pennsylvania), which varied in their  
213 meteorological and geological model inputs provided by the PWC software. This resulted in 10

214 EECs values for each pesticide. We used the maximum EEC of these 10 estimates for each  
215 pesticide in all statistical analyses.

### 216 *Statistical Analyses*

217 To determine how often maximum EECs represent worst-case scenarios of pesticides in  
218 lentic systems, we calculated the proportion of pesticides for which the maximum environmental  
219 concentrations in lentic systems exceeded maximum EECs from PWC models. In this evaluation,  
220 the point of comparison for the EEC was the highest concentration of pesticide found in the  
221 National Water Quality Monitoring Council database or in the literature. We incorporated  
222 literature and database field measurements because we wanted to use all possible available data  
223 to describe maximum lentic field values. In all other analyses, we use maximum lentic field  
224 values from the National Water Quality Monitoring Council exclusively to ensure that the  
225 methods of estimating maximum lentic and lotic field concentrations were similar, which is an  
226 important consideration for the quantitative assessment for model validation and improvement of  
227 model predictions. The literature concentrations had to be removed from these analyses because  
228 they did not use consistent sampling methodology across studies.

229 To evaluate the effects of sampling effort on detection of maximum field concentrations  
230 in lentic and lotic systems, we built two separate linear models (lm function, *stats* package<sup>23</sup>) in  
231 which the response was either maximum lentic or lotic concentration and the predictor was  
232 sampling effort, defined as the total number of times a pesticide was surveyed for between 1992  
233 and 2012 respective to each system, including surveys which resulted in no detection of the  
234 pesticide. To evaluate if inclusion of sampling effort improved model validation of maximum  
235 EECs with maximum field concentrations, first we examined the effect of sampling effort on the  
236 relationship between maximum field concentration and maximum EEC. We extracted the

237 residuals from a mixed model (lmer function, *lme4* package<sup>24</sup>) with maximum field  
238 concentration as the response and maximum EEC as the predictor with pesticide compound as  
239 the random effect. These residuals became the response in a subsequent mixed model, where the  
240 predictor was sampling effort, and the random effect was pesticide compound. Next, we  
241 compared models predicting maximum field concentrations from maximum EECs with and  
242 without observations weighted by sampling effort. We constructed linear models (lm function,  
243 *stats* package<sup>23</sup>) in which the response was either maximum field concentration detected in lentic  
244 (from NAQWA) or lotic systems (from National Water Quality Monitoring Council) and the  
245 predictors were maximum EEC, pesticide type (insecticide or herbicide), and the interaction  
246 between these two predictors. We ran each model with and without weighting observations by  
247 sampling effort. In the evaluation of the effect of maximum field concentration on maximum  
248 EEC in this set of analyses, we used a one-tailed hypothesis test because of the prediction that  
249 maximum field concentration would be positively associated with maximum EEC. To compare  
250 the amount of variance explained by each model, we calculated adjusted- $R^2$  values.

251       Lastly, we sought to evaluate if the ability of EECs to predict field concentrations in  
252 lentic systems could be improved by including landscape-level pesticide use and release as a  
253 predictor. We focus on improving EECs in reference to lentic field concentrations because the  
254 EPA uses the PWC to predict pesticide EECs in ponds and reservoirs for ecological and drinking  
255 water risk assessments, respectively<sup>17</sup>. We used multimodel inference (*MuMIn* package<sup>25</sup>, which  
256 fits models using combinations of all predictors given in a global model and ranks candidate  
257 models by second-order Akaike Information Criteria corrected for small sample sizes (AICc)  
258 (dredge function). In our global model, the response was maximum lentic concentration (from  
259 the National Water Quality Monitoring Council) and the predictors included: maximum EEC,

260 pesticide type, pesticide use, all two-way and three-way interactions between these factors. Since  
261 our purpose was to improve the ability of EECs to predict field concentrations, we only  
262 considered candidate models that included maximum EEC as a predictor. To compare the  
263 influence of model factors across all candidate models, Akaike weights for each factor were  
264 summed across models to determine relative importance scores<sup>26</sup>. To evaluate the amount of  
265 variance explained by the top model, we calculated adjusted- $R^2$  values.

266 In all statistical models in the present analyses, all continuous variables were  $\log_{10}$ -  
267 transformed to meet assumptions of the analyses. The data analyzed contained the 27 pesticides  
268 found in lentic systems when analyses pertained exclusively to lentic data or when lentic and  
269 lotic data were combined. Analyses of all 31 pesticides occurred when lotic data were examined  
270 exclusively (e.g. for evaluation of inclusion of sampling weights for model validation of EECs  
271 with lentic field concentrations). For all models to determine if the predictors significantly  
272 influenced the responses, we used the Anova function in the *car* package<sup>27</sup> ( $\alpha=0.05$ ). Figures  
273 were generated using *visreg*<sup>28</sup> and *ggplot2*<sup>29</sup> packages. *R* 3.2.1 statistical software<sup>23</sup> was used for  
274 all analyses.

275

## 276 RESULTS

277 *Do EECs represent worst-case scenarios of pesticides in lentic systems?*

278 Historically, EECs have been described as worst-case environmental concentrations<sup>15</sup>.  
279 However, maximum concentrations in lentic systems exceeded EECs for 37.5% of herbicides (6  
280 of 16) and 41.7% of insecticides (5 of 12), suggesting that for many pesticides, EECs did not  
281 represent worst-case scenarios of exposure in lentic systems.

282 *What is the effect of sampling effort on detection of maximum field concentrations?*

283 We hypothesized that maximum field concentration would increase asymptotically with  
284 sampling effort (Fig. 1B). As sampling effort increases, detected maximum field concentration  
285 should increase up to a point (gray section of Fig. 1B), after which increased sampling effort  
286 should have little to no association with maximum field concentration (white section of Fig. 1B).  
287 We observed this dichotomy in sampling effort according to environmental systems. Sampling  
288 effort was positively associated with maximum field concentration in lentic but not lotic systems  
289 (Fig. 1C, Table 2), most likely because sampling effort for pesticides in lentic systems represents  
290 a lower range of values compared to sampling effort in lotic systems. Lotic systems were  
291 sampled 4.9 times as much as lentic systems (mean number  $\pm$  standard deviation of lotic versus  
292 lentic samples per pesticide:  $16,111 \pm 10,301$  vs.  $3,304 \pm 3,005$ ). Thus, observations from lentic  
293 systems seem to fall on the section of the hypothesized curve with a positive slope where  
294 increased sampling is associated with higher detected maximum field concentrations (i.e. gray  
295 section of Fig. 1B). In contrast, observations from lotic systems seem to fall on the section of the  
296 curve closer to the asymptote, so increases in sampling effort only have marginal effects on the  
297 maximum field concentration (i.e. white section of Fig. 1B). Following this pattern, we predicted  
298 that including sampling effort would improve model validation for maximum EECs in lentic but  
299 not lotic systems.

300 *Can inclusion of sampling effort improve model validation of maximum EECs with maximum*  
301 *field concentrations?*

302 These differences in the association between sampling effort and maximum field  
303 concentration lead us to test if inclusion of sampling effort could improve model validation of  
304 maximum EECs with maximum field concentrations. In other words, we wanted to evaluate if  
305 incorporating sampling effort into models increases the variance in maximum field

306 concentrations that can be explained by maximum EECs. First, we examined the influence of  
307 sampling effort on the relationship between maximum field concentration and EECs. We  
308 observed a positive effect of sampling effort on the residuals of a model predicting maximum  
309 field concentrations from maximum EECs (Fig. 1D, Table 2). At low to medium relative levels  
310 of sampling effort ( $\log_{10}(\text{sampling effort}) = 2.24$  to  $3.78$ ), maximum EECs tend to overestimate  
311 observed maximum field concentrations, which is represented by negative residuals, and at  
312 medium to high relative levels of sampling effort ( $\log_{10}(\text{sampling effort}) = 3.78$  to  $4.57$ ),  
313 maximum EECs more often underestimate maximum field concentrations, which is represented  
314 by positive residuals (Fig. 1D).

315         Next, we sought to evaluate if the inclusion of sampling effort could increase the amount  
316 of variance explained in maximum field concentrations from lentic and lotic systems by  
317 maximum EECs, an important consideration in validation of EECs. As hypothesized, sampling  
318 effort improved the fit of maximum EECs to maximum field concentrations for lentic systems  
319 more so than for lotic systems (Fig. 2, Table 2). The maximum EECs from the PWC, which are  
320 purported to represent maximum concentrations of pesticides in ponds and reservoirs, were not a  
321 significant predictor of maximum measured pesticide concentrations in lentic systems without  
322 weights but became nearly significant when weighting by sampling effort (Table 2). In fact,  
323 weighting observations by lentic sampling effort increased the relative amount of variance  
324 explained by 50% (Fig. 2A [Adjusted  $R^2 = 0.27$ ], Fig. 2B [Adjusted  $R^2 = 0.18$ ]). For lentic  
325 models with and without sampling effort weighted, while there was a positive trend between  
326 herbicide EECs and measured concentrations of herbicides in lentic systems, there was no  
327 discernible relationship between insecticide EECs and lentic insecticide concentrations (Fig. 2A,  
328 B). In other words, maximum EECs were a poor predictor of field concentrations for insecticides



329 in lentic systems. For lotic systems, weighting observations by sampling effort increased the  
330 relative amount of variance explained by only 4% (Fig. 2C [Adjusted  $R^2 = 0.54$ ], Fig. 2D  
331 [Adjusted  $R^2 = 0.52$ ]). Maximum EECs were a significant positive predictor of maximum  
332 measured concentration of herbicides and insecticides in lotic systems regardless of whether we  
333 weighted by sampling effort or not (Table 2, Fig. 2C,D).

334 *Can EEC predictions be improved by including landscape-level pesticide use and release?*

335 To test the hypothesis that inclusion of landscape-level contaminant use and release could  
336 improve the ability of maximum EECs to predict maximum field concentrations, we used model  
337 comparison techniques. Based on model comparison, the best-fitting model of maximum  
338 measured concentrations of pesticides in lentic systems included maximum EEC and estimated  
339 national use (model weight = 0.42). In this best-fitting model, estimated national pesticide use  
340 but not maximum EEC significantly predicted maximum measured concentrations of pesticides  
341 in lentic systems (Table 2). In addition, maximum EEC and estimated national pesticide use had  
342 the greatest relative importance scores (Fig. 3A). This best-fitting model more than doubled the  
343 ability of the PWC to predict maximum concentrations of pesticides in lentic systems (Adjusted  
344  $R^2 = 0.64$  vs. Adjusted  $R^2 = 0.27$ ). Estimated national pesticide use was positively associated with  
345 maximum lentic concentration suggesting that pesticide use improves EEC predictions of  
346 herbicides and insecticides (Fig. 3B).

## 347 DISCUSSION

348 From an ecological risk assessment perspective, the ability to accurately predict  
349 concentrations of chemical contaminants is essential for the creation of defensible environmental  
350 standards, policies, guidelines, and regulations<sup>18</sup>. By leveraging over 600,000 field  
351 measurements of the most commonly used insecticides and herbicides, we use the PWC model

352 as a case study to evaluate how to improve contaminant fate and transport models more  
353 generally. Consistent with our hypotheses, we demonstrate that incorporating environmental  
354 sampling effort and landscape-level contaminant use or release improves model validation and  
355 prediction, respectively, an approach that can be applied to other fate and transport models.  
356 Inclusion of sampling effort in model validation greatly improves the ability of EECs to predict  
357 the variance of field concentrations in poorly sampled lentic systems but only marginally  
358 improves prediction in well-sampled lotic systems. In addition, inclusion of landscape-level  
359 pesticide use as a measurement of multiple contaminant point-sources more than doubles the  
360 ability of the PWC model to predict maximum concentrations of pesticides in lentic systems.  
361 *Model Validation: The Importance of Sampling Effort on the Ability of PWC Models to Predict*  
362 *Field Concentrations*

363         When compared against maximum lentic field measurements, maximum pesticide EECs  
364 produced by PWC models for ponds and reservoirs perform poorly. For instance, historically,  
365 maximum EECs have been considered worst-case scenarios of exposure<sup>15</sup>, but our results show  
366 that this is a mischaracterization. If a maximum EEC is truly a worst-case scenario of exposure,  
367 we would expect that field concentrations of pesticides would never fall above an EEC, but for  
368 about ~40% of the most commonly used pesticides measured, field values exceed EECs. This  
369 finding is important because if risk assessors and policy makers consider maximum EECs as  
370 worst-case concentrations to gauge the greatest potential for toxicity, they would be  
371 underestimating levels of field exposures in many cases. This difference between maximum  
372 EECs and maximum field measurements indicates the need for improved model validation and  
373 prediction.

374 Testing the ability of EECs to predict field concentrations is an important step of model  
375 validation and model development<sup>20,21</sup>. Patterns of the observed relationship between sampling  
376 effort and maximum detected field concentrations lead us to the hypothesis that the importance  
377 of sampling effort on the ability of EECs to predict field concentration likely varies with lotic  
378 versus lentic systems because of differences in the amount of pesticide sampling effort in each  
379 system. For instance, lentic systems are sampled about 4.9 times as much as lotic systems.  
380 Because the relationship between sampling effort and maximum field concentration in lotic  
381 systems is positive, we hypothesized that sampling effort would be important for EECs to predict  
382 field concentrations in this system. In contrast, because sampling effort only has marginal effects  
383 on maximum field concentrations in lotic systems, we predicted that sampling effort would have  
384 little to no effect on the ability of EECs to predict field concentrations.

385 Consistent with our hypothesis, we show that the ability of maximum EECs to predict  
386 maximum field concentrations can be improved by weighting observations by sampling effort in  
387 both lentic and lotic systems, but the magnitude of this improvement is greater for lentic than  
388 lotic systems. Weighting observation by sampling effort increased the relative amount of  
389 variance explained by 4% for lotic systems and 50% for lentic systems. Consequently, these  
390 results demonstrate that accounting for contaminant sampling effort is an important component  
391 of model validation, especially when sampling efforts fall within the range in which sampling  
392 effort is positively correlated with maximum field concentrations. If scientists validate EECs by  
393 comparing maximum EECs to maximum environmental concentrations in order to determine if  
394 EECs are accurate or not, they must account for the variance in maximum environmental  
395 concentrations that are a function of sampling effort. By accounting for sampling effort,

396 scientists can more accurately determine if EECs are valid approximations of contaminant  
397 exposures.

398 For insecticides in lentic systems, even though the variance explained in maximum field  
399 concentrations by maximum EEC increases when we accounted for sampling effort (as  
400 represented by a shift in the dotted line closer to the 1:1 reference line in Fig. A compared to Fig.  
401 B), the ability of EECs to predict field concentrations was still poor (shallow slope of the dotted  
402 lines in Fig. A. and B). The inability of the maximum EECs to predict maximum field  
403 concentrations of insecticides compared to herbicides might be a function of pesticide use. Use  
404 of herbicides is about five times greater than insecticides in the US<sup>30</sup>, and so the power to detect  
405 an association between maximum herbicide EECs and maximum herbicide field concentrations  
406 should be greater than that for insecticides. As a result, maximum field concentration of  
407 herbicides might be closer to the true peak concentrations compared to insecticides.

#### 408 *Improving EEC Predictions with Landscape-level Use and Release*

409 Even when field concentrations are the result of intensive sampling, maximum EECs can  
410 still underestimate maximum field concentrations (which is represented by positive residuals in  
411 Fig. 1D). The assumption of a single point source likely results in this underestimation of the  
412 peak environmental concentrations by EECs. For instance, most fate and transport models,  
413 including the PWC, assume a single point source of contamination, but measured concentrations  
414 of contaminants in freshwater ecosystems are often the result of runoff and aerial deposition  
415 from multiple sources of contamination across the landscape.

416 With this motivation, we attempted to improve the ability of EECs to predict field  
417 concentrations in lentic systems by accounting for landscape-level pesticide use. For both  
418 herbicides and insecticides, landscape-level pesticide use improved the ability of EECs to predict

419 maximum concentrations in lentic systems, more than doubling the variance explained compared  
420 to a model without landscape-level use. Most notably, when the model accounted for sampling  
421 effort and pesticide use, the ability of EECs to predict maximum field concentrations in lentic  
422 systems went from no relationship (Fig. 2A) to a significant positive relationship (Fig. 3B).  
423 Improvement in EECs by inclusion of pesticide use is what we would predict if environmental  
424 pollution is the result of multiple point sources of contamination. These results suggest that  
425 pesticide use at the national level is likely an improved indicator of pesticide loading into a  
426 freshwater ecosystem than the single point-source of contamination that is assumed in the current  
427 PWC model. USGS pesticide use estimates are likely a conservative representation of pesticide  
428 inputs because they represent only agricultural applications and ignore pesticide applications in  
429 homes and industry.

430       Estimated environmental concentrations from contaminant fate and transport models are  
431 favored ways to characterize exposure risk by regulatory agencies because they are low cost, low  
432 effort, and provide consistent methodology for estimates across compounds<sup>15</sup>. Currently, these  
433 models represent the best methods that have been developed to estimate concentrations of  
434 contaminants in the environment. However, these models stand to be improved to increase the  
435 accuracy of predictions. We demonstrate that not only are pesticide maximum EECs produced by  
436 the PWC model poor characterizations of worst-case exposures, but they also perform poorly at  
437 predicting concentrations of pesticides in their intended lentic systems across pesticide types.  
438 Estimates of field concentrations in lentic systems can be improved by leveraging large datasets  
439 of measured environmental concentration and accounting for sampling effort in validation of  
440 models. In addition, including landscape-level contaminant use as a proxy for multiple-sources  
441 of contamination can improve PWC model predictions. Scientists active in the development of

442 environmental fate and transport models recognize the importance of including multiple sources  
443 of contamination. For instance, models widely used in the United States and Europe incorporate  
444 multiple point sources of contamination including the Soil and Water Assessment Tool  
445 (SWAT)<sup>31</sup>, ChimERA Fate<sup>32</sup>, and Stream-EU<sup>33</sup>. The inclusion of field survey information and  
446 landscape-level use for pesticides is easily accomplished because these data are already included  
447 separately in the most current ecological risk assessments used for pesticide regulation<sup>34</sup>. In  
448 general, because of environmental laws and regulation requiring reporting of pollution, including  
449 the Emergency Planning and Community Right-to-Know Act, the Resource Conservation and  
450 Recovery Act, the Toxic Substances Control Act, the Clean Water Act, and the Clean Air Act,  
451 there is a clear understanding of the identity and amounts of multiple point sources of many  
452 contaminants from industry and agriculture. So, the amounts of contaminants released into the  
453 environment at the landscape-level could be feasibly incorporated into EEC models for non-  
454 pesticide contaminants as well.

455         Given our results, the next step for improvement of the PWC model would be for EPA  
456 staff members to directly include pesticide use in the mechanistic model. Access to the  
457 proprietary computer code that underlies the PWC model prevented us from doing so in the  
458 current study. Improving the understanding of the determinants of maximum concentrations of  
459 pesticides in lentic systems is not only important for improving exposure characterization as a  
460 part of federal ecological risk assessment, but is also critical for the understanding and protecting  
461 small freshwater bodies which provide critical habitat to communities of plants and animals<sup>14,35</sup>  
462 and serve an underestimated role in the functioning of ecosystems<sup>36</sup>. Improvement of  
463 contaminant fate and distribution models used in federal risk assessments and in the development

464 of regulations is critical if we are to use the best science available to make data driven policy  
465 decisions.

466

467 Acknowledgments. We appreciate the advice of D. Young concerning the implementation of  
468 EPA's PWC models, and M. Mahon concerning coding for figures. This work was supported by  
469 funds from the National Science Foundation (EF-1241889, EEID-1518681), the National  
470 Institutes of Health (R01GM109499, R01TW010286-01), the U.S. Department of Agriculture  
471 (NRI 2009-35102-0543).

472 Supporting Information. Data used in the current analyses are provided in the supporting  
473 information.

474

REFERENCES

- 475 (1) Nel, A.; Xia, T.; Mädler, L.; Li, N. Toxic Potential of Materials at the Nanolevel. *Science*.  
476 2006, pp 622–627.
- 477 (2) Rhind, S. M. Anthropogenic Pollutants: A Threat to Ecosystem Sustainability? *Philos.*  
478 *Trans. R. Soc. B Biol. Sci.* **2009**, *364* (1534), 3391–3401.
- 479 (3) Bernhardt, E. S.; Rosi, E. J.; Gessner, M. O. Synthetic Chemicals as Agents of Global  
480 Change. *Front. Ecol. Environ.* **2017**, *15* (2), 84–90.
- 481 (4) Braun, J. M. Early-Life Exposure to EDCs: Role in Childhood Obesity and  
482 Neurodevelopment. *Nat. Rev. Endocrinol.* **2017**, *13* (3), 161–173.
- 483 (5) Larsen, A. E.; Gaines, S. D.; Deschênes, O. Agricultural Pesticide Use and Adverse Birth  
484 Outcomes in the San Joaquin Valley of California. *Nat. Commun.* **2017**, *8* (1).
- 485 (6) Kampa, M.; Castanas, E. Human Health Effects of Air Pollution. *Environmental*  
486 *Pollution*. 2008, pp 362–367.
- 487 (7) Meybeck, M.; Helmer, R. The Quality of Rivers: From Pristine Stage to Global Pollution.  
488 *Palaeogeogr. Palaeoclimatol. Palaeoecol.* **1989**, *75* (4), 283–309.
- 489 (8) Fleeger, J. W.; Carman, K. R.; Nisbet, R. M. Indirect Effects of Contaminants in Aquatic  
490 Ecosystems. *Sci. Total Environ.* **2003**, *317* (1–3), 207–233.
- 491 (9) Rohr, J. R.; McCoy, K. A. A Qualitative Meta-Analysis Reveals Consistent Effects of  
492 Atrazine on Freshwater Fish and Amphibians. *Environmental Health Perspectives*. 2010,  
493 pp 20–32.
- 494 (10) Atwood, D.; Paisley-Jones, C. *Pesticides Industry Sales and Usage 2008–2012 Market*  
495 *Estimates*; Washington, DC, 2017.
- 496 (11) Stone, W. W.; Gilliom, R. J.; Ryberg, K. R. Pesticides in U.S. Streams and Rivers:



- 497 Occurrence and Trends during 1992-2011. *Environ. Sci. Technol.* **2014**, 48 (19), 11025–  
498 11030.
- 499 (12) Gilliom, R. J.; Hamilton, P. A. *Pesticides in the Nation's Streams and Ground Water,*  
500 *1992-2001-A Summary*; 2006.
- 501 (13) Dudgeon, D.; Arthington, A. H.; Gessner, M. O.; Kawabata, Z. I.; Knowler, D. J.;  
502 Lévêque, C.; Naiman, R. J.; Prieur-Richard, A. H.; Soto, D.; Stiassny, M. L. J.; et al.  
503 Freshwater Biodiversity: Importance, Threats, Status and Conservation Challenges.  
504 *Biological Reviews of the Cambridge Philosophical Society.* 2006, pp 163–182.
- 505 (14) Strayer, D. L.; Dudgeon, D. Freshwater Biodiversity Conservation: Recent Progress and  
506 Future Challenges. *J. North Am. Benthol. Soc.* **2010**, 29 (1), 344–358.
- 507 (15) US EPA. *Guidelines for Exposure Assessment*; Washington, DC, 1992; Vol. 57.
- 508 (16) Young, D. F. *The Variable Volume Water Model Revision A*; Washington, DC, 2016.
- 509 (17) Luo, Y. *Methodology for Evaluating Pesticides for Surface Water Protection III. Module*  
510 *for Urban Scenarios*; Sacramento, CA, 2014.
- 511 (18) US EPA. *An Examination of EPA Risk Assessment Principles and Practices*; Washington,  
512 DC, 2004.
- 513 (19) Crawford, C. G. Sampling Strategies for Estimating Acute and Chronic Exposures of  
514 Pesticides in Streams. *J. Am. Water Resour. Assoc.* **2004**, 40 (2), 485–502.
- 515 (20) Bellocchi, G.; Rivington, M.; Donatelli, M.; Matthews, K. Validation of Biophysical  
516 Models: Issues and Methodologies. *Agron. Sustain. Dev.* **2010**, 30 (1), 109–130.
- 517 (21) Jakeman, A. J.; Letcher, R. A.; Norton, J. P. Ten Iterative Steps in Development and  
518 Evaluation of Environmental Models. *Environ. Model. Softw.* **2006**, 21 (5), 602–614.
- 519 (22) Sage, A. P. Validation. In *Systems analysis & control encyclopedia: theory, technology,*

- 520           *applications*; Singh, M. G., Ed.; Pergamon: Oxford, United Kingdom, 1987.
- 521 (23) R Core Team. *R: A Language and Environment for Statistical Computing*; Vienna,  
522           Austria, 2018.
- 523 (24) Bates, D.; Mächler, M.; Bolker, B.; Walker, S. Fitting Linear Mixed-Effects Models Using  
524           Lme4. *J. Stat. Softw.* **2015**, *67* (1), 51.
- 525 (25) Bartoń, K. *MuMIn: Multi-Model Inference*; 2016.
- 526 (26) Burnham, K. P.; Anderson, D. R. *Model Selection and Multimodel Inference: A Practical*  
527           *Information-Theoretic Approach*, 2nd ed.; Springer Science & Business Media: New  
528           York, 2002; Vol. 172.
- 529 (27) Fox, J.; Weisberg, S. *An {R} Companion to Applied Regression, Second Edition.*;  
530           Thousand Oaks, CA: Sage, 2011.
- 531 (28) Breheny, P.; Burchett, W. *Visualization of Regression Models. R Package Version 2.3-0*;  
532           <http://CRAN.R-project.org/package=visreg>, 2016.
- 533 (29) Wickham, H. *Ggplot2: Elegant Graphics for Data Analysis*; Springer-Verlag New York,  
534           NY, 2009.
- 535 (30) Grube, A.; Donaldson, D.; Kiely, T.; Wu, L. *Pesticides Industry Sales and Usage: 2006*  
536           *and 2007 Market Estimates*; 2011.
- 537 (31) Arnold, J. G.; Srinivasan, R.; Muttiah, R. S.; Williams, J. R. Large Area Hydrologic  
538           Modeling and Assessment Part I: Model Development. *J. Am. Water Resour. Assoc.* **1998**,  
539           *34* (1), 73–89.
- 540 (32) Morselli, M.; Semplice, M.; De Laender, F.; Van den Brink, P. J.; Di Guardo, A.  
541           Importance of Environmental and Biomass Dynamics in Predicting Chemical Exposure in  
542           Ecological Risk Assessment. *Sci. Total Environ.* **2015**, *526*, 338–345.

- 543 (33) Lindim, C.; van Gils, J.; Cousins, I. T. A Large-Scale Model for Simulating the Fate &  
544 Transport of Organic Contaminants in River Basins. *Chemosphere* **2016**, *144*, 803–810.
- 545 (34) Farruggia, F. T.; Rossmeisl, C. M. *Preliminary Ecological Risk Assessment for*  
546 *Benfluralin*; Washington, DC, 2017.
- 547 (35) Balian, E. V.; Segers, H.; Lévêque, C.; Martens, K. The Freshwater Animal Diversity  
548 Assessment: An Overview of the Results. *Hydrobiologia*. 2008, pp 627–637.
- 549 (36) Costanza, R.; de Groot, R.; Sutton, P.; van der Ploeg, S.; Anderson, S. J.; Kubiszewski, I.;  
550 Farber, S.; Turner, R. K. Changes in the Global Value of Ecosystem Services. *Glob.*  
551 *Environ. Chang.* **2014**, *26* (1), 152–158.
- 552

553 Table 1. List of pesticide active ingredients and type included in the present analyses. Pesticide  
554 abbreviations are used as point labels in the subsequent figures.

| Pesticide Active Ingredient | Pesticide Abbreviation | Pesticide Type |
|-----------------------------|------------------------|----------------|
| 2,4-D                       | 24D                    | herbicide      |
| Acetochlor                  | ACE                    | herbicide      |
| Alachlor                    | ALA                    | herbicide      |
| Atrazine                    | ATR                    | herbicide      |
| Bromoxynil                  | BRO                    | herbicide      |
| Dicamba                     | DIC                    | herbicide      |
| Dimethenamid                | DID                    | herbicide      |
| Diuron                      | DIU                    | herbicide      |
| Glyphosate                  | GLY                    | herbicide      |
| MCPA                        | MCP                    | herbicide      |
| Metolachlor                 | MET                    | herbicide      |
| Metribuzin                  | MTR                    | herbicide      |
| Oxyfluorfen                 | OXY                    | herbicide      |
| Pendimethalin               | PEN                    | herbicide      |
| Simazine                    | SIM                    | herbicide      |
| Trifluralin                 | TRI                    | herbicide      |
| Aldicarb                    | ALD                    | insecticide    |
| Carbaryl                    | CAR                    | insecticide    |
| Carbofuran                  | CBO                    | insecticide    |
| Chlorpyrifos                | CHL                    | insecticide    |
| Clothianidin                | CLO                    | insecticide    |
| Diazinon                    | DIA                    | insecticide    |
| Dimethoate                  | DIM                    | insecticide    |
| Imidacloprid                | IMD                    | insecticide    |
| Malathion                   | MAL                    | insecticide    |
| Methomyl                    | MTH                    | insecticide    |
| Methyl Parathion            | MLP                    | insecticide    |
| Phorate                     | PHO                    | insecticide    |
| Propargite                  | PRO                    | insecticide    |
| Tefluthrin                  | TEF                    | insecticide    |
| Terbufos                    | TER                    | insecticide    |

555

556 Table 2. Analyses summaries examining 1) the influence of sampling effort on maximum (max.)  
 557 lentic concentration, lotic concentration, and the residuals of maximum field concentration  
 558 predicted by maximum estimated environmental concentration (EEC), and 2) the influence of  
 559 maximum EECs on maximum lentic and lotic concentrations with and without sampling effort  
 560 weighted. In this set of analyses, we used one-tailed tests for the effect of max. EEC on field  
 561 concentrations. Finally, 3) we include a summary of the best fitting model predicting maximum  
 562 lentic concentrations from model selection. *P*-values less than 0.05 are bolded.  $\chi^2$  statistics  
 563 correspond with a mixed model. F statistics correspond with non-mixed models. The data  
 564 analyzed contained the 27 pesticides detected in lentic systems for all analyses, excluding  
 565 evaluations between maximum lotic concentration and maximum EEC that included all 31  
 566 pesticides.

| Response                                       | Source of Variation       | F/ $\chi^2$ | p                |
|------------------------------------------------|---------------------------|-------------|------------------|
| Max. lentic concentration                      | Lentic sampling effort    | 4.552       | <b>0.043</b>     |
| Max. lotic concentration                       | Lotic sampling effort     | 0.436       | 0.515            |
| Residuals(max. field concentration ~ max. EEC) | Sampling effort           | 12.339      | <b>&lt;0.001</b> |
| Max. lentic concentration                      |                           |             |                  |
| Weighted by sampling effort                    | Max. EEC                  | 2.860       | 0.052            |
|                                                | Pesticide type            | 2.341       | 0.140            |
|                                                | Max. EEC * Pesticide type | 1.611       | 0.217            |
| Max. lentic concentration                      |                           |             |                  |
| Not weighted                                   | Max. EEC                  | 1.569       | 0.112            |
|                                                | Pesticide type            | 2.028       | 0.168            |
|                                                | Max. EEC * Pesticide type | 0.944       | 0.341            |
| Max. lotic concentration                       |                           |             |                  |
| Weighted by sampling effort                    | Max. EEC                  | 21.315      | <b>&lt;0.001</b> |
|                                                | Pesticide type            | 2.016       | 0.167            |
|                                                | Max. EEC * Pesticide type | 0.362       | 0.552            |
| Max. lotic concentration                       |                           |             |                  |
| Not weighted                                   | Max. EEC                  | 17.395      | <b>&lt;0.001</b> |
|                                                | Pesticide type            | 1.290       | 0.266            |
|                                                | Max. EEC * Pesticide type | 0.775       | 0.386            |

|     |                           |                          |        |                  |
|-----|---------------------------|--------------------------|--------|------------------|
|     | Max. lentic concentration | Max. lotic concentration | 1.702  | 0.204            |
| 567 |                           | Pesticide use            | 30.594 | <b>&lt;0.001</b> |

---

568 **Figure 1. A)** Conceptual model for improving fate and transport models like the Pesticide in  
569 Water Calculator (PWC), which produces estimated environmental concentrations (EEC) for  
570 pesticides. First, predicted EECs need to be validated using measured field concentrations to  
571 determine their accuracy. We predict that accounting for sampling effort will improve the fit  
572 between EECs and field measurements. Second, we will improve EECs by accounting for  
573 multiple sources of contaminant use or release. The accuracy of EECs is important because they  
574 used in federal decision making. **B)** Predicted asymptotic relationship between sampling effort  
575 and maximum (max.) field concentration. As sampling effort increases, the likelihood of  
576 detecting a peak concentration increases when sampling effort is at low to mid-levels as shown  
577 in gray. At mid to high levels of sampling effort, the influence of increased sampling effort on  
578 the likelihood of detecting a peak concentration reaches a limit, and no discernible relationship  
579 exists between sampling effort and max. field concentration as shown in white. We predict that  
580 sampling effort would account for more variance between maximum field concentration and  
581 maximum estimated environmental concentration (EEC) when sampling effort occurs in the  
582 lower range (in gray) compared to the higher range (in white). **C)** Observed relationship between  
583 sampling effort and maximum field concentration in lotic (circles, solid line) and lentic  
584 (triangles, dashed line) systems. Increased sampling effort is positively associated with  
585 maximum lentic concentration (Table 2,  $F = 4.552$ ,  $p = 0.043$ ) but not maximum lotic  
586 concentration (Table 2,  $F = 0.436$ ,  $p = 0.515$ ). The positive relationship for lentic systems  
587 matches the positive relationship at low to mid-sampling effort shown in gray in Figure 1B. The  
588 absence of a relationship for lotic systems matches the asymptote at mid to high sampling effort  
589 in Figure 1B. **D)** Observed relationship between sampling effort and the residuals of maximum  
590 field concentrations in lotic (circles) and lentic (triangles) in systems and EEC (Table 2,  $\chi^2 =$

591 12.339,  $p < 0.001$ ). As sampling effort increases, the likelihood of a field concentration exceeding  
592 an EEC increases, which is represented by a positive residual. Gray band represent a 95%  
593 confidence interval, and a light gray reference line at 0 represents where maximum field  
594 concentration would equal maximum EEC.

595

596 **Figure 2.** Associations between herbicide and insecticide maximum (max.) estimated  
597 environmental concentrations (EEC) and measured maximum field concentrations in lentic (A  
598 and B) and lotic (C and D) systems. Models were built with (A and C) and without (B and D)  
599 observations weighted by sampling effort. The association between maximum EEC and  
600 maximum field concentration is significant for the lotic system with and without observations  
601 weighted by sampling effort (Table 2,  $p < 0.001$ , C and D) and nearly significant for lentic system  
602 when observations are weighted by sampling effort (Table 2,  $p = 0.052$ , A and B). In all panels  
603 herbicides are shown with solid circles and solid lines, and insecticides are shown with triangles  
604 and dashed lines. Individual pesticides are labeled above and to the left of the point (see Table 1  
605 for abbreviations). Gray bands represent 95% confidence intervals, and light gray lines are 1:1  
606 references lines.

607

608 **Figure 3. A)** Relative importance scores of factors from model comparisons, evaluating the best  
609 predictors of maximum concentration of pesticides in lentic systems. Maximum estimated  
610 environmental concentration is abbreviated as Max. EEC. **B)** Conditional plot displaying the  
611 significant effect of estimated national pesticide use on maximum (max.) lentic concentration,  
612 controlling for maximum EEC, soil half-life, and pesticide type (based on best fitting model,



613 Table 2,  $F = 30.594$ ,  $p < 0.001$ ). Gray bands represent 95% confidence intervals. Conditional plot  
614 was generated using the *visreg* package in *R*.

615

616 Figure 1.

617

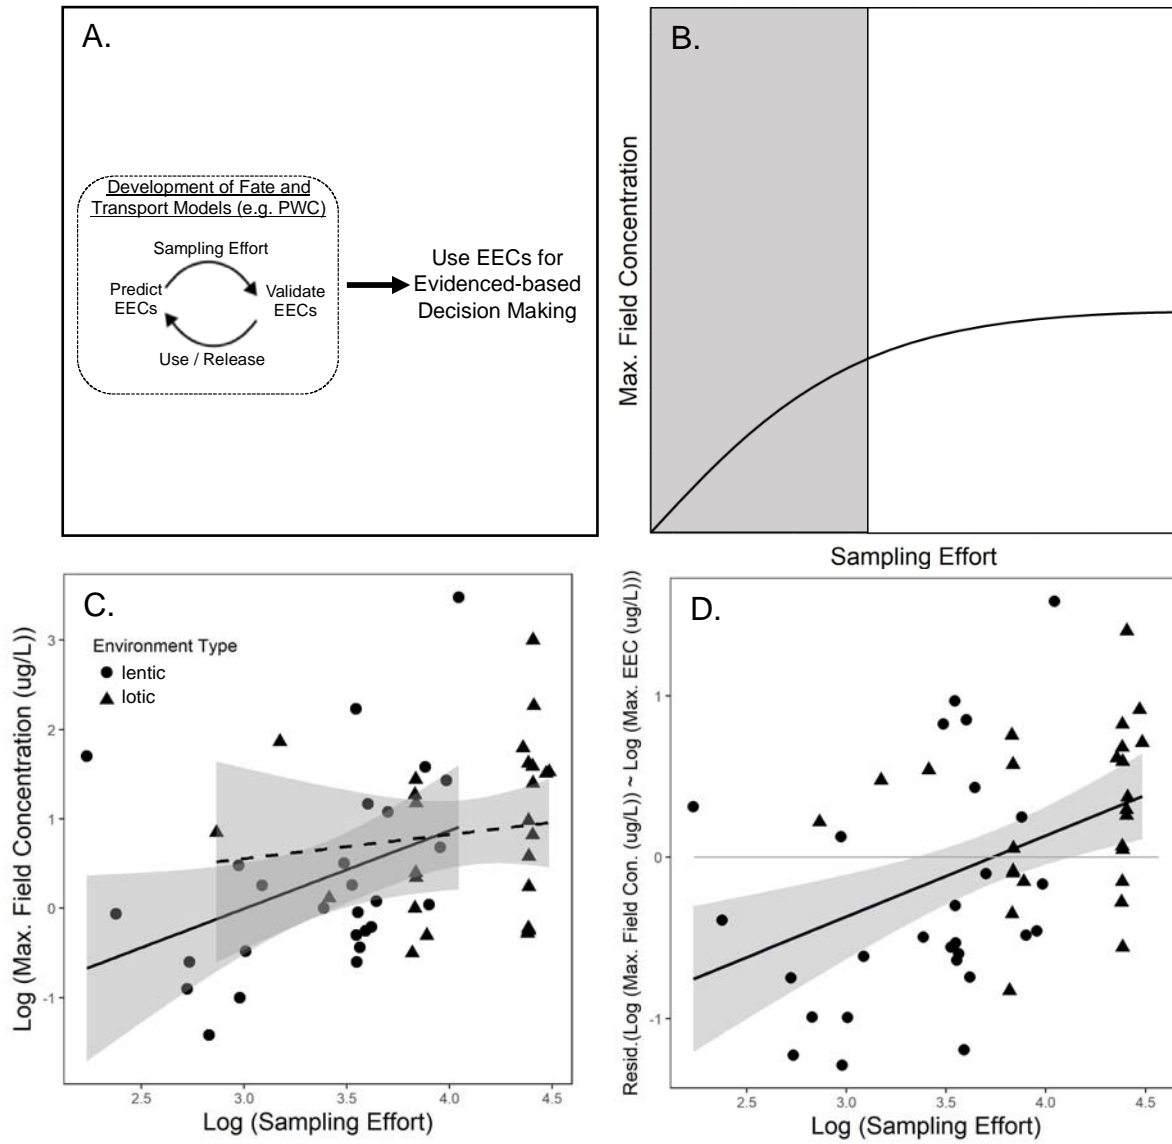

618 Figure 2.

619

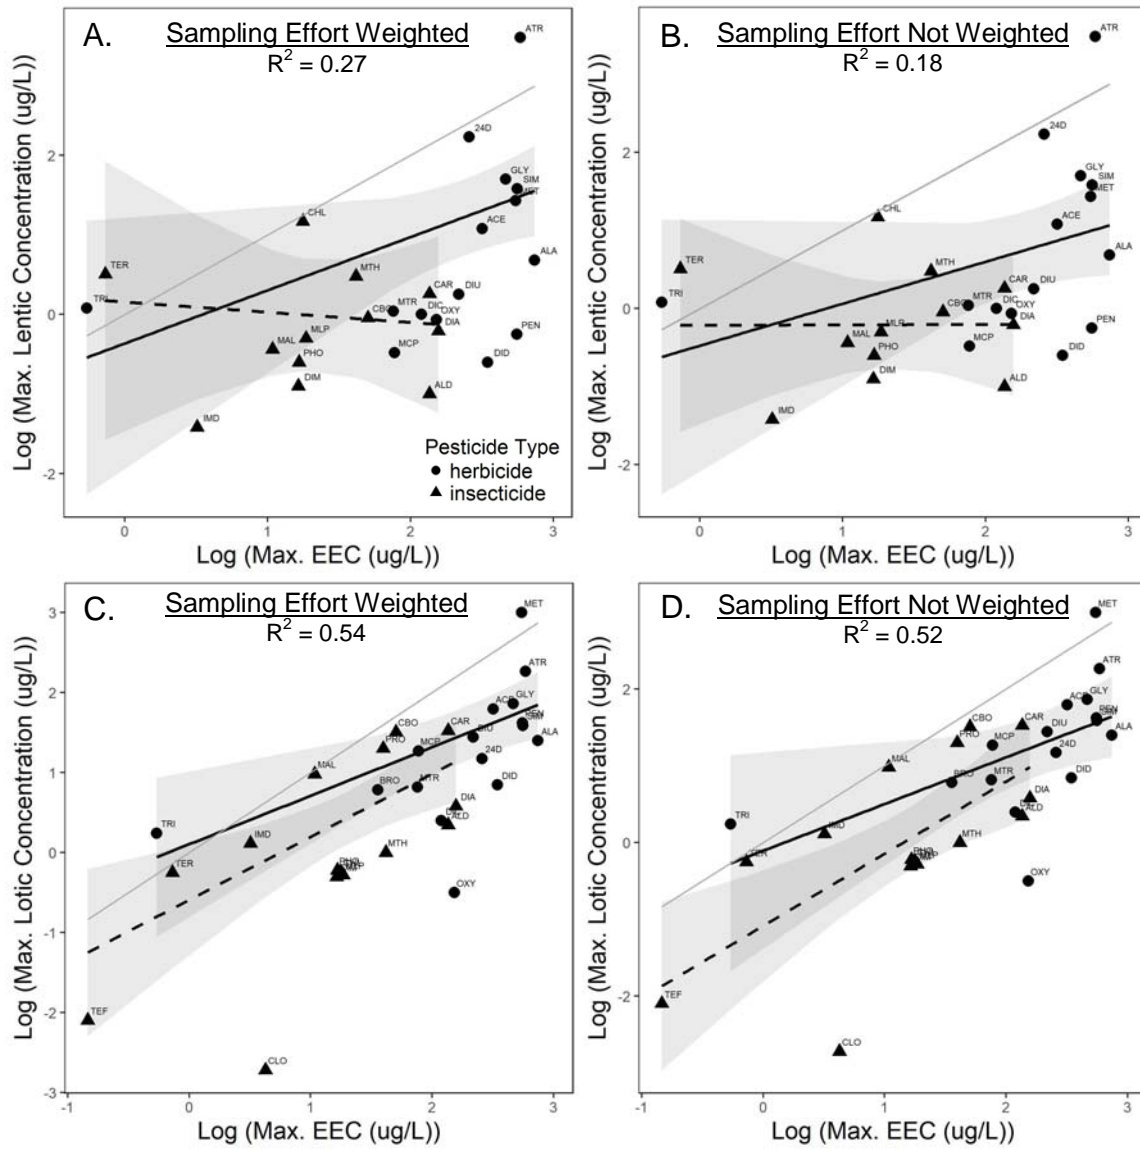

620

621 Figure 3

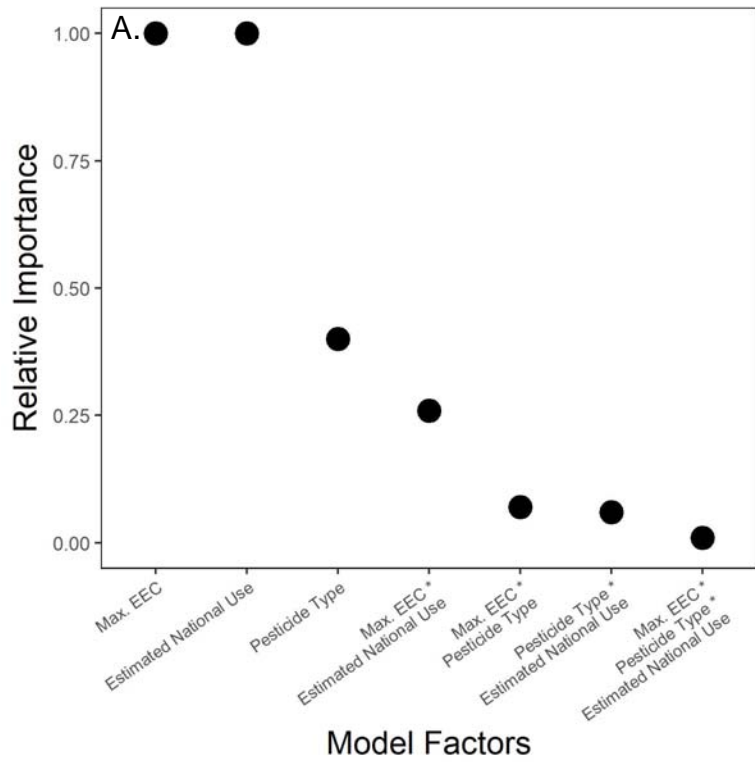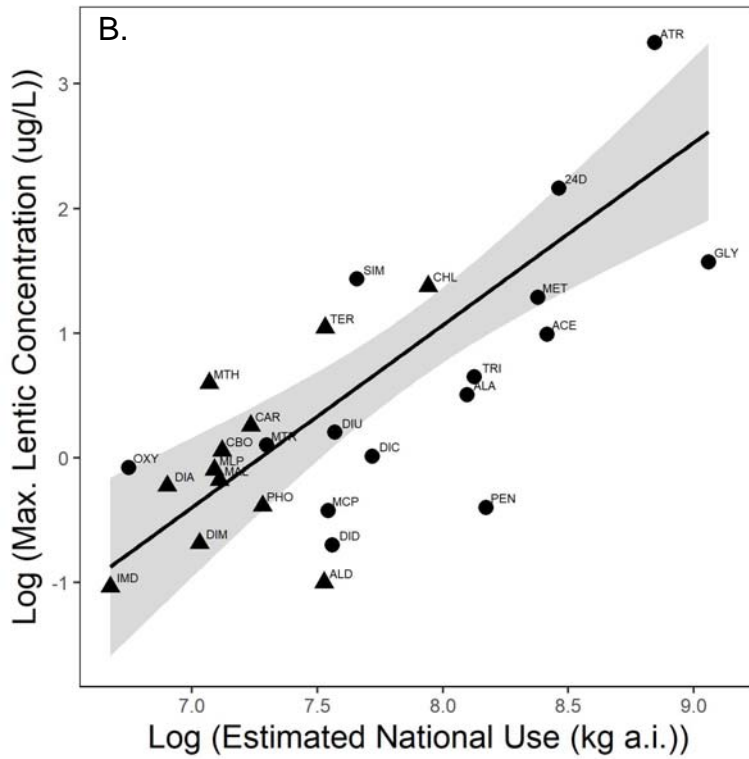

Source: https://www.biorxiv.org/content/10.1101/472969v1.full.pdf
